# Supplementary material for: Automated echocardiographic left ventricular dimension assessment in dogs using artificial intelligence: Development and validation
Source: PubMed Central journal article supplement (PMC10937473; doi:10.1111/jvim.17012), 2024-02-16
Supplement: JVIM-38-922-s001.pdf [file JVIM-38-922-s001.pdf]

## Section/Topic Item Checklist Item Page

**Much of this form is not relevant because this is not a prediction model, in the sense of statistically attempting to predict outcome events. However, our study does have a development phase of the AI model, and a validation phase, and therefore we are filling in the relevant sections on this form.**

| <b>Title and abstract</b>    |     |     |                                                                                                                                                                                                  |                                                  |
|------------------------------|-----|-----|--------------------------------------------------------------------------------------------------------------------------------------------------------------------------------------------------|--------------------------------------------------|
| Title                        | 1   | D;V | Identify the study as developing and/or validating a multivariable prediction model, the target population, and the outcome to be predicted.                                                     | 1                                                |
| Abstract                     | 2   | D;V | Provide a summary of:<br><br>objectives,<br>study design,<br>setting,<br>participants,<br>sample size,<br>predictors,<br>outcome,<br>statistical analysis,<br>results, and<br>conclusions.       | 1<br>2<br>2<br>2<br>2<br>n/a<br>2<br>2<br>2<br>3 |
| <b>Introduction</b>          |     |     |                                                                                                                                                                                                  |                                                  |
| Background and objectives    | 3a  | D;V | Explain the medical context (including whether diagnostic or prognostic) and rationale for developing or validating the multivariable prediction model, including references to existing models. | 7                                                |
|                              | 3b  | D;V | Specify the objectives, including whether the study describes the development or validation of the model or both.                                                                                | 7                                                |
| <b>Methods</b>               |     |     |                                                                                                                                                                                                  |                                                  |
| Source of data               | 4a  | D;V | Describe the study design or source of data (e.g., randomized trial, cohort, or registry data), separately for the development and validation data sets, if applicable.                          | 8                                                |
|                              | 4b  | D;V | Specify the key study dates, including start of accrual; end of accrual; and, if applicable, end of follow-up.                                                                                   | 8                                                |
| Participants                 | 5a  | D;V | Specify key elements of the study setting (e.g., primary care, secondary care, general population) including number and location of centres.                                                     | 8                                                |
|                              | 5b  | D;V | Describe eligibility criteria for participants.                                                                                                                                                  | 8                                                |
|                              | 5c  | D;V | Give details of treatments received, if relevant.                                                                                                                                                | n/a                                              |
| Outcome                      | 6a  | D;V | Clearly define the outcome that is predicted by the prediction model, including how and when assessed.                                                                                           | 10                                               |
|                              | 6b  | D;V | Report any actions to blind assessment of the outcome to be predicted.                                                                                                                           | 10                                               |
| Predictors                   | 7a  | D;V | Clearly define all predictors used in developing or validating the multivariable prediction model, including how and when they were measured.                                                    | n/a                                              |
|                              | 7b  | D;V | Report any actions to blind assessment of predictors for the outcome and other predictors.                                                                                                       | n/a                                              |
| Sample size                  | 8   | D;V | Explain how the study size was arrived at.                                                                                                                                                       | 8                                                |
| Missing data                 | 9   | D;V | Describe how missing data were handled (e.g., complete-case analysis, single imputation, multiple imputation) with details of any imputation method.                                             | There were no missing data                       |
| Statistical analysis methods | 10a | D   | Describe how predictors were handled in the analyses.                                                                                                                                            | n/a                                              |
|                              | 10b | D   | Specify type of model, all model-building procedures (including any predictor selection), and method for internal validation.                                                                    | 10-14                                            |
|                              | 10c | V   | For validation, describe how the predictions were calculated.                                                                                                                                    | 13-15                                            |
|                              | 10d | D;V | Specify all measures used to assess model performance and, if relevant, to compare multiple models.                                                                                              | 16                                               |

|                            |     |     |                                                                                                                                                                                                       |            |
|----------------------------|-----|-----|-------------------------------------------------------------------------------------------------------------------------------------------------------------------------------------------------------|------------|
|                            | 10e | V   | Describe any model updating (e.g., recalibration) arising from the validation, if done.                                                                                                               | None       |
| Risk groups                | 11  | D;V | Provide details on how risk groups were created, if done.                                                                                                                                             | n/a        |
| Development vs. validation | 12  | V   | For validation, identify any differences from the development data in setting, eligibility criteria, outcome, and predictors.                                                                         | 11         |
| <b>Results</b>             |     |     |                                                                                                                                                                                                       |            |
| Participants               | 13a | D;V | Describe the flow of participants through the study, including the number of participants with and without the outcome and, if applicable, a summary of the follow-up time. A diagram may be helpful. | 11         |
|                            | 13b | D;V | Describe the characteristics of the participants (basic demographics, clinical features, available predictors), including the number of participants with missing data for predictors and outcome.    | Appendix 1 |
|                            | 13c | V   | For validation, show a comparison with the development data of the distribution of important variables (demographics, predictors and outcome).                                                        | n/a        |
| Model development          | 14a | D   | Specify the number of participants and outcome events in each analysis.                                                                                                                               | n/a        |
|                            | 14b | D   | If done, report the unadjusted association between each candidate predictor and outcome.                                                                                                              | n/a        |
| Model specification        | 15a | D   | Present the full prediction model to allow predictions for individuals (i.e., all regression coefficients, and model intercept or baseline survival at a given time point).                           | n/a        |
|                            | 15b | D   | Explain how to use the prediction model.                                                                                                                                                              | 23         |
| Model performance          | 16  | D;V | Report performance measures (with CIs) for the prediction model.                                                                                                                                      | 27         |
| Model-updating             | 17  | V   | If done, report the results from any model updating (i.e., model specification, model performance).                                                                                                   | n/a        |
| <b>Discussion</b>          |     |     |                                                                                                                                                                                                       |            |
| Limitations                | 18  | D;V | Discuss any limitations of the study (such as nonrepresentative sample, few events per predictor, missing data).                                                                                      | 23         |
| Interpretation             | 19a | V   | For validation, discuss the results with reference to performance in the development data, and any other validation data.                                                                             | 18-20      |
|                            | 19b | D;V | Give an overall interpretation of the results, considering objectives, limitations, results from similar studies, and other relevant evidence.                                                        | 21-23      |
| Implications               | 20  | D;V | Discuss the potential clinical use of the model and implications for future research.                                                                                                                 | 22-23      |
| <b>Other information</b>   |     |     |                                                                                                                                                                                                       |            |
| Supplementary information  | 21  | D;V | Provide information about the availability of supplementary resources, such as study protocol, Web calculator, and data sets.                                                                         | 20-21      |
| Funding                    | 22  | D;V | Give the source of funding and the role of the funders for the present study.                                                                                                                         | n/a        |

\*Items relevant only to the development of a prediction model are denoted by D, items relating solely to a validation of a prediction model are denoted by V, and items relating to both are denoted D;V. We recommend using the TRIPOD Checklist in conjunction with the TRIPOD Explanation and Elaboration document.
