# Supplementary material for: Automated echocardiographic left ventricular dimension assessment in dogs using artificial intelligence: Development and validation
Source: PubMed Central journal article supplement (PMC10937473; doi:10.1111/jvim.17012), 2024-02-16
Supplement: JVIM-38-922-s002.pdf [file JVIM-38-922-s002.pdf]

## **Appendix 1 - Training Dataset**

The frames from the 1914 images of the training dataset were taken from a variety of timepoints in the cardiac cycle, and not solely end-systolic and end-diastolic. This was to maximize the exposure of the neural network to the full range of behavior of the ventricle.

Each frame was single-labeled by a trainer, specifically for this research project. Routine clinical measurements were not used, because this study did not have access to clinical measurements and because this study wished to train on frames throughout the cardiac cycle.

### Appendix 1, Table 1

We tabulated the breed and weight of all dogs receiving a departmental transthoracic echocardiogram in 2018.

| <b>Breed</b>         | <b>Number in Study</b> | <b>Avg. Weight (kg)</b> |
|----------------------|------------------------|-------------------------|
| Affenpinscher        | 1                      | 4.0                     |
| Airedale Terrier     | 1                      | 32.0                    |
| Alaskan Malamute     | 1                      | 63.5                    |
| Basset Hound         | 3                      | 26.6                    |
| Beagle               | 1                      | 23.5                    |
| Bearded Collie       | 1                      | 12.8                    |
| Bernese Mountain Dog | 1                      | 55.5                    |
| Bichon Frise         | 7                      | 7.1                     |
| Border Collie        | 7                      | 18.4                    |
| Boston Terrier       | 2                      | 8.0                     |
| Bouvier De Ardennes  | 1                      | 38.1                    |
| Boxer                | 17                     | 30.4                    |
| Bruxellois Griffon   | 1                      | 5.3                     |
| Bulldog              | 2                      | 20.6                    |

|                                       |    |      |
|---------------------------------------|----|------|
| Cairn Terrier                         | 3  | 7.7  |
| Cavalier King Charles Spaniel         | 39 | 10.4 |
| Chesapeake Bay Retriever              | 1  | 29.8 |
| Chihuahua                             | 23 | 4.4  |
| Cocker Spaniel                        | 21 | 13.8 |
| Collie                                | 1  | 29.0 |
| Coton De Tulear                       | 1  | 5.9  |
| Crossbreed                            | 74 | 15.0 |
| Czechoslovakian Wolfdog               | 1  | 28.5 |
| Dalmatian                             | 3  | 27.7 |
| Doberman Pinscher                     | 8  | 35.0 |
| Dogue De Bordeaux                     | 5  | 61.0 |
| English Bulldog                       | 2  | 24.3 |
| English Pointer                       | 1  | 25.4 |
| English Setter                        | 1  | 29.9 |
| English Springer Spaniel              | 5  | 24.6 |
| English Staffordshire Bull<br>Terrier | 1  | 22.2 |
| Flat-Coated Retriever                 | 1  | 37.6 |
| Fox Terrier                           | 1  | 8.3  |

|                      |    |      |
|----------------------|----|------|
| French Bulldog       | 7  | 11.7 |
| German Shepherd Dog  | 8  | 38.6 |
| Golden Retriever     | 11 | 30.2 |
| Great Dane           | 2  | 61.3 |
| Greyhound            | 5  | 31.0 |
| Hungarian Vizsla     | 3  | 27.7 |
| Husky                | 2  | 30.0 |
| Irish Terrier        | 1  | 20.0 |
| Jack Russel Terrier  | 13 | 6.7  |
| Japanese Spitz       | 2  | 10.9 |
| King Charles Spaniel | 1  | 14.7 |
| Labrador             | 28 | 29.4 |
| Leonberger           | 2  | 53.1 |
| Lhasa Apso           | 2  | 6.4  |
| Lurcher              | 2  | 21.8 |
| Maltese              | 7  | 3.7  |
| Miniature Dachshund  | 6  | 6.1  |
| Miniature Pinscher   | 2  | 2.7  |
| Miniature Schnauzer  | 7  | 10.8 |
| Neapolitan Mastiff   | 1  | 68.6 |

|                             |   |       |
|-----------------------------|---|-------|
| Newfoundland                | 6 | 57.7  |
| Norfolk Terrier             | 1 | 7.0   |
| Old English Sheepdog        | 1 | 38.0  |
| Parson Russell Terrier      | 2 | 9.3   |
| Patterdale Terrier          | 2 | 9.3   |
| Pekingese                   | 2 | 6.0   |
| Polish Lowland Sheepdog     | 1 | 17.6  |
| Pomeranian                  | 4 | 4.4   |
| Pug                         | 2 | 3.2   |
| Rhodesian Ridgeback         | 1 | 48.3  |
| Rottweiler                  | 3 | 52.8  |
| Rough Collie                | 1 | 16.8  |
| Saint Bernard               | 1 | 108.0 |
| Schnauzer                   | 1 | 10.5  |
| Shar-Pei                    | 1 | 22.0  |
| Shih Tzu                    | 5 | 8.0   |
| Soft-Coated Wheaten Terrier | 2 | 18.0  |
| Spanish Water Dog           | 1 | 14.3  |
| Springer Spaniel            | 3 | 14.5  |
| Staffordshire Bull Terrier  | 7 | 18.4  |

|                             |    |      |
|-----------------------------|----|------|
| Standard Dachshund          | 3  | 17.2 |
| Standard Poodle             | 2  | 26.5 |
| Tibetan Terrier             | 3  | 10.0 |
| Toy Poodle                  | 2  | 6.4  |
| Trailhound                  | 1  | 23.0 |
| Weimaraner                  | 3  | 29.2 |
| Welsh Border Collie         | 1  | 20.2 |
| West Highland White Terrier | 6  | 9.1  |
| Whippet                     | 3  | 11.3 |
| Wire-Haired Fox Terrier     | 2  | 5.4  |
| Yorkshire Terrier           | 11 | 6.3  |
